# Supplementary material
Source: PubMed Central journal article supplement (PMC9826787)
Supplement: 41598_2022_27348_MOESM1_ESM.pdf [file 41598_2022_27348_MOESM1_ESM.pdf]

## Supplemental Information Title & Legends

**Supplemental Figure 1: EBV immunodominant antigens show increased homology with MS-associated proteins in comparison to CMV antigens.** The same analysis was performed as in Figure 1A, using EBV<sup>69</sup> and CMV<sup>70</sup> immunodominant epitopes.

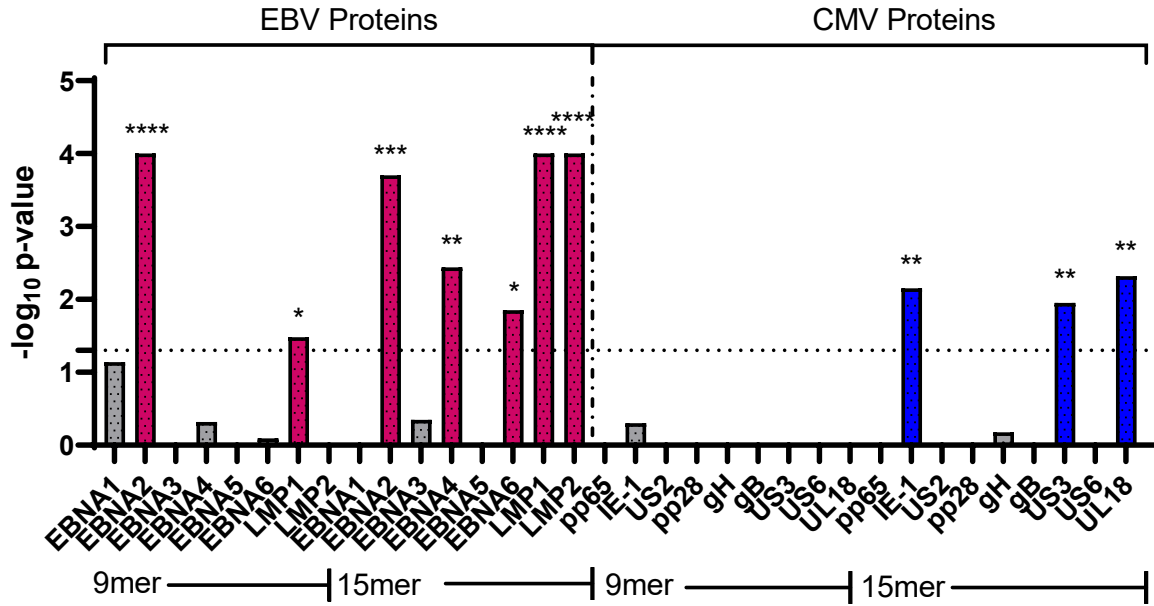

**Supplemental Table 1: PEPMatch output from significant tests.**

This table contains all of output from significant PEPMatch runs found in the main manuscript, including results from SARS-CoV-2 and seasonal coronaviruses. Data includes pathogen, matching peptide sequences and lengths, gene names, protein IDs, the number of mismatches and mutated positions. Note that duplicate peptide sequences for a single test were deleted prior to statistical testing, which is not reflected in this table.

**Supplemental Table 2: Raw values of PEPMatch output for statistical testing.**

This table contains all values post processing utilized in Fisher's exact testing for statistical analysis.

Supplemental Table 2: Raw Values of PEPMatch Output for Statistical Testing

| Organism                             | Protein                                     | Protein Abbreviation | Peptide Length | Total Matches | Ave Random Matches | Total Possible Matches | p Value | Log <sub>10</sub> Transform |
|--------------------------------------|---------------------------------------------|----------------------|----------------|---------------|--------------------|------------------------|---------|-----------------------------|
| SARS-CoV-2                           | Spike                                       | S                    | 9mer           | 12            | 5                  | 1265                   | 0.1421  | 0.847405923                 |
| SARS-CoV-2                           | Spike                                       | S                    | 15mer          | 66            | 48                 | 1259                   | 0.1028  | 0.988006885                 |
| SARS-CoV-2                           | Membrane                                    | M                    | 9mer           | 0             | 1                  | 214                    | 1       | 0                           |
| SARS-CoV-2                           | Membrane                                    | M                    | 15mer          | 6             | 10                 | 208                    | 1       | 0                           |
| SARS-CoV-2                           | Nucleocapsid                                | N                    | 9mer           | 13            | 3                  | 411                    | 0.0201  | 1.696803943                 |
| SARS-CoV-2                           | Nucleocapsid                                | N                    | 15mer          | 48            | 21                 | 405                    | 0.0009  | 3.045757491                 |
| SARS-CoV-2                           | NS7a                                        | 7a                   | 9mer           | 1             | 1                  | 113                    | 1       | 0                           |
| SARS-CoV-2                           | NS7a                                        | 7a                   | 15mer          | 1             | 5                  | 107                    | 1       | 0                           |
| SARS-CoV-2                           | RIAB/ORF1ab                                 | rep                  | 9mer           | 37            | 32                 | 7088                   | 0.6293  | 0.201142268                 |
| SARS-CoV-2                           | RIAB/ORF1ab                                 | rep                  | 15mer          | 297           | 251                | 7082                   | 0.0499  | 1.301899454                 |
| SARS-CoV-2                           | Envelope                                    | E                    | 9mer           | 2             | 1                  | 67                     | 1       | 0                           |
| SARS-CoV-2                           | Envelope                                    | E                    | 15mer          | 2             | 4                  | 61                     | 1       | 0                           |
| HCoV-229E                            | Spike                                       | S                    | 9mer           | 6             | 6                  | 1165                   | 1       | 0                           |
| HCoV-229E                            | Spike                                       | S                    | 15mer          | 46            | 47                 | 1159                   | 1       | 0                           |
| HCoV-229E                            | Membrane                                    | M                    | 9mer           | 5             | 1                  | 217                    | 0.2155  | 0.666552726                 |
| HCoV-229E                            | Membrane                                    | M                    | 15mer          | 16            | 6                  | 211                    | 0.0465  | 1.332547047                 |
| HCoV-229E                            | Nucleocapsid                                | N                    | 9mer           | 5             | 2                  | 381                    | 0.451   | 0.345823458                 |
| HCoV-229E                            | Nucleocapsid                                | N                    | 15mer          | 32            | 21                 | 375                    | 0.1536  | 0.813608784                 |
| HCoV-NL63                            | Spike                                       | S                    | 9mer           | 4             | 6                  | 1348                   | 1       | 0                           |
| HCoV-NL63                            | Spike                                       | S                    | 15mer          | 40            | 50                 | 1342                   | 1       | 0                           |
| HCoV-NL63                            | Membrane                                    | M                    | 9mer           | 0             | 1                  | 218                    | 1       | 0                           |
| HCoV-NL63                            | Membrane                                    | M                    | 15mer          | 9             | 9                  | 212                    | 1       | 0                           |
| HCoV-NL63                            | Nucleocapsid                                | N                    | 9mer           | 4             | 2                  | 369                    | 0.6862  | 0.163549286                 |
| HCoV-NL63                            | Nucleocapsid                                | N                    | 15mer          | 46            | 19                 | 363                    | 0.0006  | 3.22184875                  |
| HCoV-OC43                            | Spike                                       | S                    | 9mer           | 9             | 7                  | 1345                   | 0.803   | 0.095284455                 |
| HCoV-OC43                            | Spike                                       | S                    | 15mer          | 55            | 42                 | 1339                   | 0.2144  | 0.668775219                 |
| HCoV-OC43                            | Membrane                                    | M                    | 9mer           | 0             | 1                  | 222                    | 1       | 0                           |
| HCoV-OC43                            | Membrane                                    | M                    | 15mer          | 5             | 5                  | 216                    | 1       | 0                           |
| HCoV-OC43                            | Nucleocapsid                                | N                    | 9mer           | 2             | 2                  | 440                    | 1       | 0                           |
| HCoV-OC43                            | Nucleocapsid                                | N                    | 15mer          | 51            | 20                 | 434                    | 0.0002  | 3.698970004                 |
| HCoV-HKU1                            | Spike                                       | S                    | 9mer           | 5             | 6                  | 1348                   | 1       | 0                           |
| HCoV-HKU1                            | Spike                                       | S                    | 15mer          | 51            | 48                 | 1342                   | 0.8378  | 0.076859644                 |
| HCoV-HKU1                            | Membrane                                    | M                    | 9mer           | 0             | 1                  | 215                    | 1       | 0                           |
| HCoV-HKU1                            | Membrane                                    | M                    | 15mer          | 11            | 7                  | 209                    | 0.4708  | 0.327163546                 |
| HCoV-HKU1                            | Nucleocapsid                                | N                    | 9mer           | 6             | 2                  | 433                    | 0.2868  | 0.542420853                 |
| HCoV-HKU1                            | Nucleocapsid                                | N                    | 15mer          | 66            | 17                 | 427                    | 0.0001  | 4                           |
| Epstein-Barr virus (strain B95-8)    | Epstein-Barr nuclear antigen 1              | EBNA1                | 9mer           | 77            | 57                 | 418                    | 0.073   | 1.13667714                  |
| Epstein-Barr virus (strain B95-8)    | Epstein-Barr nuclear antigen 1              | EBNA1                | 15mer          | 234           | 307                | 486                    | 1       | 0                           |
| Epstein-Barr virus (strain B95-8)    | Epstein-Barr nuclear antigen 2              | EBNA2                | 9mer           | 32            | 8                  | 457                    | 0.0001  | 4                           |
| Epstein-Barr virus (strain B95-8)    | Epstein-Barr nuclear antigen 2              | EBNA2                | 15mer          | 119           | 72                 | 462                    | 0.0002  | 3.698970004                 |
| Epstein-Barr virus (strain B95-8)    | Epstein-Barr nuclear antigen 3              | EBNA3                | 9mer           | 7             | 7                  | 930                    | 1       | 0                           |
| Epstein-Barr virus (strain B95-8)    | Epstein-Barr nuclear antigen 3              | EBNA3                | 15mer          | 64            | 55                 | 930                    | 0.4483  | 0.348431261                 |
| Epstein-Barr virus (strain B95-8)    | Epstein-Barr nuclear antigen 4              | EBNA4                | 9mer           | 11            | 7                  | 917                    | 0.4785  | 0.320118058                 |
| Epstein-Barr virus (strain B95-8)    | Epstein-Barr nuclear antigen 4              | EBNA4                | 15mer          | 87            | 53                 | 917                    | 0.0036  | 2.443697499                 |
| Epstein-Barr virus (strain B95-8)    | Epstein-Barr nuclear antigen leader protein | EBNA5                | 9mer           | 3             | 10                 | 111                    | 1       | 0                           |
| Epstein-Barr virus (strain B95-8)    | Epstein-Barr nuclear antigen leader protein | EBNA5                | 15mer          | 15            | 82                 | 111                    | 1       | 0                           |
| Epstein-Barr virus (strain B95-8)    | Epstein-Barr nuclear antigen 6              | EBNA6                | 9mer           | 9             | 7                  | 954                    | 0.8028  | 0.095392636                 |
| Epstein-Barr virus (strain B95-8)    | Epstein-Barr nuclear antigen 6              | EBNA6                | 15mer          | 85            | 56                 | 965                    | 0.0141  | 1.850780887                 |
| Epstein-Barr virus (strain B95-8)    | Latent membrane protein 1                   | LMP1                 | 9mer           | 12            | 3                  | 351                    | 0.0333  | 1.477555766                 |
| Epstein-Barr virus (strain B95-8)    | Latent membrane protein 1                   | LMP1                 | 15mer          | 67            | 25                 | 357                    | 0.0001  | 4                           |
| Epstein-Barr virus (strain B95-8)    | Latent membrane protein 2                   | LMP2                 | 9mer           | 4             | 5                  | 489                    | 1       | 0                           |
| Epstein-Barr virus (strain B95-8)    | Latent membrane protein 2                   | LMP2                 | 15mer          | 79            | 39                 | 483                    | 0.0001  | 4                           |
| Human cytomegalovirus (strain AD169) | 65 kDa phosphoprotein                       | pp65                 | 9mer           | 4             | 4                  | 553                    | 1       | 0                           |
| Human cytomegalovirus (strain AD169) | 65 kDa phosphoprotein                       | pp65                 | 15mer          | 11            | 20                 | 547                    | 1       | 0                           |
| Human cytomegalovirus (strain AD169) | Immediate early protein IE1                 | IE-1                 | 9mer           | 6             | 3                  | 483                    | 0.5058  | 0.296021175                 |
| Human cytomegalovirus (strain AD169) | Immediate early protein IE1                 | IE-1                 | 15mer          | 48            | 25                 | 477                    | 0.007   | 2.15490196                  |
| Human cytomegalovirus (strain AD169) | Envelope glycoprotein B                     | gB                   | 9mer           | 5             | 5                  | 898                    | 1       | 0                           |
| Human cytomegalovirus (strain AD169) | Envelope glycoprotein B                     | gB                   | 15mer          | 34            | 33                 | 892                    | 1       | 0                           |
| Human cytomegalovirus (strain AD169) | Unique short US2 glycoprotein               | US2                  | 9mer           | 0             | 0                  | 191                    | 1       | 0                           |
| Human cytomegalovirus (strain AD169) | Unique short US2 glycoprotein               | US2                  | 15mer          | 3             | 6                  | 185                    | 1       | 0                           |
| Human cytomegalovirus (strain AD169) | Cytoplasmic envelopment protein 3           | UL99                 | 9mer           | 2             | 1                  | 182                    | 1       | 0                           |
| Human cytomegalovirus (strain AD169) | Cytoplasmic envelopment protein 3           | UL99                 | 15mer          | 13            | 10                 | 176                    | 0.6671  | 0.175809059                 |
| Human cytomegalovirus (strain AD169) | Envelope glycoprotein H                     | gH                   | 9mer           | 4             | 5                  | 735                    | 1       | 0                           |
| Human cytomegalovirus (strain AD169) | Envelope glycoprotein H                     | gH                   | 15mer          | 34            | 35                 | 729                    | 1       | 0                           |
| Human cytomegalovirus (strain AD169) | Membrane glycoprotein US3                   | US3                  | 9mer           | 0             | 0                  | 178                    | 1       | 0                           |
| Human cytomegalovirus (strain AD169) | Membrane glycoprotein US3                   | US3                  | 15mer          | 19            | 6                  | 172                    | 0.0113  | 1.946921557                 |
| Human cytomegalovirus (strain AD169) | Unique short US6 glycoprotein               | US6                  | 9mer           | 0             | 1                  | 175                    | 1       | 0                           |
| Human cytomegalovirus (strain AD169) | Unique short US6 glycoprotein               | US6                  | 15mer          | 3             | 7                  | 169                    | 1       | 0                           |
| Human cytomegalovirus (strain AD169) | Glycoprotein UL18                           | UL18                 | 9mer           | 3             | 2                  | 360                    | 1       | 0                           |
| Human cytomegalovirus (strain AD169) | Glycoprotein UL18                           | UL18                 | 15mer          | 26            | 9                  | 354                    | 0.0048  | 2.318758763                 |
